## $\mu$ ECoG Recordings Through a Thinned Skull

1 Sarah K. Brodnick<sup>1</sup>, Jared P. Ness<sup>1</sup>, Thomas J. Richner<sup>1</sup>, Sanitta Thongpang<sup>3</sup>, Joseph Novello<sup>1</sup>,  
2 Mohammed Hayat<sup>1</sup>, Kevin P Cheng<sup>1</sup>, Lisa Krugner-Higby<sup>2</sup>, Aaron J. Suminski<sup>1</sup>, Kip A.  
3 Ludwig<sup>1</sup>, Justin C. Williams<sup>1\*</sup>

4 <sup>1</sup>Department of Biomedical Engineering, University of Wisconsin-Madison, 1550 Engineering Drive,  
5 Madison, WI USA 53706

6 <sup>2</sup>Laboratory Department of Surgical Sciences, School of Veterinary Medicine, University of  
7 Wisconsin Madison, 2015 Linden Drive, Madison, WI 53706

8 <sup>3</sup>Department of Biomedical Engineering, Mahidol University, 25/25 Puttamonton 4 Road, Salaya,  
9 Puttamonton, Nakorn Pathom 73170, Thailand

### 10 \* Correspondence:

11 Justin Williams  
12 jwilliams@enr.wisc.edu

13 **Keywords:** Thinned skull<sub>1</sub>,  $\mu$ ECoG<sub>2</sub>, Local Field Potentials<sub>3</sub>, Optogenetics<sub>4</sub>, Somatosensory  
14 Evoked Potentials<sub>5</sub>. (Min.5-Max. 8)

### 15 Abstract

16 The studies described in this paper for the first time characterize the acute and chronic performance  
17 of optically transparent thin-film  $\mu$ ECoG grids implanted on a thinned skull as both an  
18 electrophysiological complement to existing thinned skull preparation for optical  
19 recordings/manipulations, and a less invasive alternative to epidural or subdurally placed  $\mu$ ECoG  
20 arrays. In a longitudinal chronic study,  $\mu$ ECoG grids placed on top of a thinned skull maintain  
21 impedances comparable to epidurally placed  $\mu$ ECoG grids that are stable for periods of at least one  
22 month. Optogenetic activation of cortex is also reliably demonstrated through the optically  
23 transparent ECoG grids acutely placed on the thinned skull. Finally, spatially distinct  
24 electrophysiological recordings were evident on  $\mu$ ECoG electrodes placed on a thinned skull  
25 separated by 500-750 $\mu$ m, as assessed by stimulation evoked responses using optogenetic activation  
26 of cortex as well as invasive and epidermal stimulation of the sciatic and median nerve at chronic  
27 time points. Neural signals were collected through a thinned skull in multiple species, demonstrating  
28 potential utility in neuroscience research applications such as *in vivo* imaging, optogenetics, calcium  
29 imaging, and neurovascular coupling.

30

### 31 1 Introduction

32 Electrophysiological recordings of brain activity using high density electrode arrays are a staple of  
33 neuroscience research and have become increasingly prevalent for the clinical diagnosis of epileptic  
34 seizure foci as well as the clinical deployment of Brain-Machine Interfaces (BMI) [1; 2; 3].  
35 Traditional electrophysiological recording methods involve the implantation of invasive electrode

36 arrays either indwelling within cortex [4; 5], beneath the dura (subdural) [6; 7; 8], on top of the dura  
37 (epidural) [9; 10; 11], or non-invasively on the skin directly on above the exterior of the skull [12]. It  
38 is generally accepted that electrode placement closer to the neural signal sources of interest within the  
39 brain yields a more information rich and spatially distinct signal [13], whereas activity measured at a  
40 distance non-invasively is attenuated in part by the high impedance skull, yielding less spatially  
41 distinct information in the recorded signal from electrode to electrode [14; 15].

42 More recently, there has been a growing appreciation that surgical methods to open the skull, and/or  
43 the placement of an indwelling electrode grid on or within cortex, may cause adverse effects that  
44 impact the neural circuitry of interest [13; 16; 17]. For example, increased glial scarring [15; 18; 19],  
45 large increases in temperature of cortex [20], changes in intracranial pressure [21], intracranial  
46 hemorrhage and/or physical depression of cortex [18; 21; 22], and bacterial infection [21] have all  
47 been linked to the surgical procedure and implantation of electrocorticography (ECoG) or indwelling  
48 cortical arrays. These adverse events cause subtle changes to the neural circuitry of interest that have  
49 been shown to cause long-lasting deficit in performance of fine motor tasks amongst other  
50 consequences[16].

51 Concurrently there has been growing interest in neuroscience experiments that thin the skull instead  
52 of opening the skull to perform experiments using optical methods to record and manipulate both  
53 neuronal and non-neuronal cells within the brain [23; 24; 25; 26]. Removal of the skull in rodents  
54 has been shown to create glial scarring in the area under the craniotomy (Yang 2010 Nature  
55 Protocols, Yan 2009 J. Neurosci). Unlike the outer compact layer of the skull which has low  
56 conductivity, the spongy bone of the skull closer to the brain is low impedance [27] and if thinned  
57 appropriately is optically transparent [28]. However, the performance of  $\mu$ ECoG grids placed  
58 chronically on a thinned skull preparation has yet to be evaluated.

59  
60 To address this gap, a series of acute and chronic studies was performed where the skull was thinned  
61 to a translucent layer and implanted with a  $\mu$ ECoG array.  $\mu$ ECoG arrays were used in the  
62 experiments described because of their flexibility, transparency, and well characterized epidural  
63 signal profile [9; 10]. In rats chronically implanted for one month, impedance values and evoked  
64 somatosensory evoked potentials (SSEPs) were recorded at regular intervals to assess stability of  
65 electrical function and spatial resolution of recordings through the thinned skull. Cortical signals  
66 from optogenetic stimulation in a ChR2 mouse were recorded in an acute terminal session through a  
67 thinned skull and were compared to recordings through the dura after removal of the thinned skull.  
68 These studies tested multiple common stimulation paradigms for neuroscience research in multiple  
69 species to characterize the reliability and spatial resolution of electrophysiological recordings through  
70 a thinned skull.

## 71 **2 Materials and Methods**

### 72 **2.1 Ethics Statement**

73 All animal procedures were approved by the Institutional Animal Care and Use Committee (IACUC)  
74 at the University of Wisconsin - Madison. All efforts were made to minimize animal discomfort.

### 75 **2.2 Device Fabrication**

76  $\mu$ ECoG devices were fabricated following protocols previously described for polyimide [10] and  
77 Parylene C [29] arrays (Figure 1). Rat sized polyimide (750  $\mu$ m spacing, 250  $\mu$ m site diameter)  
78 (Figure 1b) or Parylene C (750  $\mu$ m spacing, 200  $\mu$ m site diameter) (Figure 1c) based  $\mu$ ECoG

79 electrode arrays were custom fabricated with 16 platinum sites (one or two 4mm x 4mm grids) and  
80 implanted unilaterally or bilaterally (Figure 1c) between bregma and lambda in Sprague-Dawley rats.  
81 Similarly, for experiments with mice, a smaller, 2mm x 2mm 16 platinum site Parylene-C  $\mu$ ECoG  
82 array (500  $\mu$ m spacing, 150  $\mu$ m site diameter), was fabricated and used for optogenetic experiments  
83 (Figure 2c). Parylene C was chosen for optogenetic and imaging studies due to its flexibility and  
84 translucent properties.

## 85 **2.3 Surgical Preparation**

### 86 **Chronic Experiments**

87 Male Sprague-Dawley rats (n=7, Envigo, Indianapolis IN) 2-4 months old were chronically  
88 implanted with custom built  $\mu$ ECoG arrays (Figure 1a). Three rats were implanted with bilateral  
89 arrays over thinned skull, three rats were implanted with bilateral arrays over the dural surface, and  
90 one rat was implanted with a bilateral array, one over thinned skull and one over the dura. The  
91 electrode array on the dural hemisphere for this animal was damaged during insertion and not viable  
92 therefore electrophysiology and impedance data were not included in this paper, however,  
93 histological staining was performed and included. Surgical procedures were based on previously  
94 published methods [30]. Before surgery, buprenorphine hydrochloride (0.05 mg kg<sup>-1</sup>, Reckitt  
95 Benckiser Healthcare) was administered for analgesia and dexamethasone (2 mg kg<sup>-1</sup>, AgriLabs) to  
96 prevent cerebral edema. Rats were induced with 5% isoflurane gas in O<sub>2</sub> and maintained on 1.0-  
97 2.5% throughout the duration of the surgery. Following induction, rats were placed into a stereotaxic  
98 frame with the scalp shaved and prepped with alternating povidone iodine and alcohol. The skin was  
99 incised, and the exposed skull was cleaned and dried. Three stainless steel screws (stainless steel,  
100 00–80 × 1/8 in.), two for attachment of a ground wire, and another for reference and mechanical  
101 support, were attached to the rostral and caudal areas of the skull. Next, UV curable dental acrylic  
102 (Fusio, Pentron Clinical) was placed on the periphery of the exposed skull to provide an anchor for  
103 the attachment of future acrylic, and two craniotomies (~5mm x 5mm) or thin skull areas were drilled  
104 over somatosensory cortex. A thinned skull area was made by drilling through the top layer of  
105 compact bone, through the spongy layer, and slightly into the lower compact bone where it became  
106 transparent. The  $\mu$ ECoG arrays were placed epidurally or over a thinned skull area and covered with  
107 a thin layer of GelFoam (Pharmacia and Upjohn Co, New York, NY) and saline before being covered  
108 by dental acrylic. GelFoam was used to prevent acrylic from covering the electrode array and was  
109 only placed on top of the arrays and not beneath. The ZIF connector was then secured to the skull  
110 and a purse string suture (3-0 vicryl) closed the skin wound. Triple antibiotic ointment was applied to  
111 the wound during closing to prevent infection. Rats were monitored post-surgically until they were  
112 ambulatory and showed no signs of pain or distress. Another dose of buprenorphine was  
113 administered 8-12 hours after the initial dose to relieve any pain the animal may have been  
114 experiencing following the surgery. Ampicillin (50 mg kg<sup>-1</sup> SC, Sage Pharmaceutical) was  
115 administered twice daily for seven days postoperatively to prevent infection.

### 116 **2.4 Periodic Chronic Electrophysiology Testing**

117 Sensorimotor evoked potentials were recorded periodically for up to one month under sedation in rats  
118 with chronic  $\mu$ ECoG implants to assess signal stability and uniqueness/spatial resolution of  
119 information recorded on nearby sites. Dexmedetomidine (50  $\mu$ grams/kg subcutaneous injection  
120 (SC)) was used to achieve sedation. Atipamezole (0.5 mg/kg SC) was administered at the end of the  
121 procedure as a reversal agent. Dexmedetomidine sedation was supplemented with small amounts of  
122 isoflurane (0-0.5%) throughout the procedure to deepen sedation. The sciatic or median nerve,  
123 hindlimb or forelimb respectively, were stimulated weekly to evoke somatosensory evoked potentials

124 (SSEPs). Needle or surface stimulation electrodes were used. Needle electrodes were placed on  
125 either side of the sciatic nerve, 3mm apart. Surface electrodes were placed on shaved skin above the  
126 sciatic or median nerve, with a reference electrode placed below the leg. Stimulation pulses were  
127 applied using needle electrodes (monophasic 0-0.8mA for 2ms), or surface electrodes (monophasic  
128 0.5-3.5mA for 1ms) both at approximately 0.5 Hz. The cortical response was recorded  
129 simultaneously at 24KHz using a multichannel recording system (TDT, Alachua, Florida).

## 130 **2.5 Acute Terminal Experiments**

131 Three Thy1::ChR2/H134R-YFP (ChR2) mice (Jackson Laboratory; stock number 012350) ~6-16  
132 weeks old were implanted during acute terminal recording sessions with  $\mu$ ECoG arrays implanted  
133 over the dura or a thinned skull area to compare neural signals recorded from light stimulation  
134 (Figure 2a, 2b). Evoked potential data from optogenetic stimulation were collected from three mice  
135 and strength duration curve data were collected from one mouse. Arrays were placed onto a thinned  
136 skull first, and then placed epidurally after removing the thinned skull. Mouse surgical procedures  
137 were similar to previously published methods [31]. Briefly, mice were administered buprenorphine  
138 hydrochloride (0.05 mg kg<sup>-1</sup>) and dexamethasone (1 mg kg<sup>-1</sup> SC) before induction, induced, and  
139 maintained with 1-2.5% isoflurane. The animal was placed in a stereotaxic-like frame and a  
140 craniotomy or thinned skull was performed. A  $\mu$ ECoG array was placed on the dura or thinned skull  
141 and ground and reference wires were coiled and placed on a small area of thinned skull on the  
142 contralateral hemisphere. GelFoam was not used in optogenetic studies. Instead the cortical surface  
143 was continually kept wet with a saline drip.

144  
145 Heart rate and blood oxygen concentration in both species were monitored throughout the surgery  
146 using a pulse oximeter. Body temperature was monitored with a digital thermometer and regulated  
147 with a water-circulated heating blanket.

## 148 **2.6 Acute Terminal Optogenetic Electrophysiological Testing**

149 Optogenetically evoked potentials were recorded during a terminal procedure by shining light through  
150 a fiber coupled LASER system or LED through an optically transparent parylene  $\mu$ ECoG onto the  
151 dura or thinned skull of ChR2 mice using previously reported methods (15) (figure 2).  
152 Photostimulation was accomplished by using an optical fiber (200 $\mu$ m in diameter, 0.22 NA, flat  
153 cleaved and polished, Thorlabs, Newton, NJ) connected to a 100mW 473 nm LASER (Laserglow,  
154 Toronto, ON) and controlled by a multichannel system (TDT, Alachua, FL). 2.5ms pulses, varying  
155 power settings, and random interstimulus intervals were used. Power at the tip of the optical fiber  
156 was approximately 80 mW/mm<sup>2</sup> and was placed approximately 1mm from the cortical or thinned  
157 skull surface. Recordings were taken with a Tucker-Davis Technologies RZ2 amplifier (TDT,  
158 Alachua, FL), and sampled with a high impedance headstage. A photostimulus delivered by an LED  
159 (465 nm, RGB MC-E, Cree, Durham, NC) approximately 2 cm away from the cortical or thinned  
160 skull surface was used to create photostimulus duration versus amplitude peak to peak potential  
161 contour plots (figure 8). Voltage pulses were changed to current pulses (0–1000 mA, 0.5–12 ms)  
162 with an LED driver (BuckBlock, LEDdynamics, Randolph, VT). Irradiance was calculated by  
163 measuring optical power (PM100D, S130C, Thor Labs, Newton, NJ) 2 cm from the LED, and the  
164 result was divided by the commercially available photo sensor's area (S370 Optometer, United  
165 Detector Technology, Hawthorne, CA).

## 166 **2.7 Electrophysiology Analysis**

167 Chronic electrical evoked responses were recorded through a thinned skull preparation.  
168 Optogenetically evoked responses from terminal mice experiments were recorded both epidurally and  
169 through a thin layer of skull. Local field potentials (LFPs) were bandpass filtered using a  
170 combination of a 2nd order, Butterworth lowpass filter (cutoff frequency = 1000 Hz), a Butterworth  
171 high pass filter (cutoff frequency = 3Hz), and a 3rd order notch filter (cutoff frequencies =55Hz and  
172 65Hz) to remove line noise. Evoked potentials were computed from the average of evoked responses  
173 from the same stimulus amplitude and channel. To increase signal-to-noise ratios, two known post  
174 processing referencing techniques, common average referencing (CAR) and small Laplacian  
175 referencing, were employed and compared (Figure 3). Each were incorporated as described in the  
176 literature [32; 33]. After small Laplacian referencing, heatmaps of the electrical and optogenetic  
177 evoked responses (Figures 4 and 7), were created using the maximum positive and negative peaks to  
178 visualize the spatial organization of the cortical responses. Each peak was defined as the average of  
179 7 data points centered at the maximum and minimum points of the response in a window defined as  
180 roughly 10ms to 35 ms post stimulus onset and subtracted [34; 35]. Channels above 600kOhms were  
181 considered to be non-functional and removed from analysis.

## 182 **2.8 Chronic Impedance Recordings and Analysis**

183 Electrical impedance spectra were collected from arrays before implantation, and periodically after  
184 implantation to assess electrical characteristics using a potentiostat (Autolab PGSTAT 128N,  
185 Metrohm, Riverview, FL) and following previously published methods (Figure 5) [36]. Arrays that  
186 were determined viable for implantation had values of approximately 50-100 k $\Omega$  at 1 kHz. Animals  
187 were trained to sit still with treats and were not anesthetized or sedated for chronic impedance  
188 measurements. Analysis consisted of data from six rats, three with thinned skull implants and three  
189 with epidural implants for comparison. Each rat had a bilateral implant consisting of 32 electrode  
190 sites. Impedance measurements were gathered from each electrode for 30 days post implantation.  
191 Resistive values at 1kHz were plotted for each of the 32 channels corresponding to length of time of  
192 the implant. Single channels with a resistance above 600 k $\Omega$  were considered outliers and eliminated  
193 from calculations for that day. Outliers were considered to be broken or due to an inadequate  
194 connection. Average resistance was plotted for each day and fitted to a curve across days using cubic  
195 spline interpolation to account for measurements potentially not lining up exactly on individual days  
196 across animals. The thinned skull implants interpolation curves were averaged together and plotted  
197 against the epidural implants averaged interpolation curves. Impedance values were not recorded  
198 after implantation in acute mice experiments, although pre-implantation impedance values were  
199 comparable to those of the devices implanted for chronic recordings in rats.

## 200 **3.0 Results and Discussion**

### 201 **3.1 Chronic periodic sensory evoked potential recordings in rats**

202 Chronic SSEP recordings were obtained weekly during electrical stimulation of the sciatic or median  
203 nerve in three rats to compare the spatial resolution of thinned skull  $\mu$ ECoG arrays versus traditional  
204 epidural arrays. Thinned skull  $\mu$ ECoG arrays were implanted bilaterally in sensorimotor cortex in  
205 each rat and SSEPs were recorded in each contralateral hemisphere from a cutaneous electrical  
206 stimulus of hindlimb or forelimb. A representative plot of thinned skull SSEPs on the left  
207 hemisphere from right hindlimb stimulation is shown in Figure 3. Using the stainless-steel bone  
208 screw as a reference, which was implanted cranial and contralateral to the  $\mu$ ECoG array (Figure 3a),  
209 recorded signals contained common noise, and differences in SSEPs from nearby electrode locations  
210 were not readily apparent. Two post process referencing techniques were used to reduce both  
211 common noise and common signal to highlight spatially distinct differences in neural signals.



212 Employing a Common Average Reference (CAR) (Figure 3b) successfully recovered spatially  
213 distinct hindlimb SSEPs on adjacent electrode sites. Similarly, employing a small Laplacian (Figure  
214 3c) reference post-hoc further highlighted spatially distinct SSEP responses on adjacent sites.  
215 Consequently, we chose to use the small Laplacian post-hoc referencing strategy for the remainder of  
216 the recording data, because it visually increased unique highlighted spatial information present in the  
217 SSEP on adjacent sites [32].

218  
219 Distinct somatotopic signals were recorded 38 days post-implantation from  $\mu$ ECoG arrays placed on  
220 a thinned skull area of the rat's right sensorimotor cortex from both left hindlimb and forelimb  
221 stimulation (Figure 4). Small Laplacian referencing methods were also applied. Highest peak to peak  
222 SSEP values from forelimb stimulation, according to the heatmap, are positioned at the anterior  
223 portion of the electrode with peaks spanning both medially and laterally (Figure 4a). When switching  
224 the area of stimulation to the hindlimb, SSEPs shifted medially similar to previously mapped rat  
225 sensorimotor cortex (Figure 4b) [35]. The recorded sensory responses are consistent with the  
226 response latencies for myelinated sensory fiber conduction, around 13ms for forelimb and 17ms for  
227 hindlimb according to previously published data [34; 35].

228  
229 Thinned skull  $\mu$ ECoG electrode arrays not surprisingly have lower signal amplitudes recorded during  
230 evoked responses in comparison to historical studies using the same arrays placed epidurally which  
231 are closer to the source of the neural signal [9]. As a result, it becomes more important to employ  
232 CAR and small Laplacian referencing strategies to eliminate common signal/noise to uncover  
233 spatially distinct spatial information for neuroscience applications. Given a similar SSEP was  
234 recorded across all electrode sites with appropriate conduction latency prior to post-hoc referencing,  
235 this may suggest the common signal was recorded at the stainless-steel bone screws in contact with  
236 the surface of the brain used for the reference and ground respectively. Although the ECoG signal  
237 recorded from the bone screws has been insignificant compared to signals recorded epidurally from  
238  $\mu$ ECoG in previous studies and therefore post-hoc referencing was not required to reveal spatially  
239 distinct information from site to site, the attenuation of signal through the thin skull made the small  
240 common signal putatively recorded from the stainless-steel screws more problematic. Consequently,  
241 post-hoc referencing was necessary before spatially distinct SSEPs were observed on adjacent  
242 electrode sites.

243  
244 Thinned skull  $\mu$ ECoG electrode arrays also have been shown in this study to record information on a  
245 temporal scale similar to epidurally placed arrays. For example, thinned skull SSEPs were recorded  
246 at a temporal resolution of roughly 15ms. Currently, GCaMP6f is a popular genetically coded  
247 calcium indication (GECI) that is commonly used to observe neural activity at an onset of  
248 approximately 45ms [37]. This suggests that the incorporation of an optically transparent  $\mu$ ECoG  
249 array with common thinned skull experiments for optical imaging would provide unique,  
250 complementary temporal information.

### 251 252 **3.2 Chronic periodic impedance spectra recordings in rats**

253  
254 To compare the electrical performance of epidural vs thinned skull placed electrodes in rats over  
255 time, we measured the impedance spectra of electrodes on each array at 1kHz periodically over the  
256 chronic implantation period (Figure 5). Impedance plots from  $\mu$ ECoG arrays implanted on a thinned  
257 skull preparation showed significantly different patterns of change over time than those implanted  
258 epidurally (Figure 5). Initial electrode impedances were similar when measured in 0.9 % w/v  
259 phosphate buffered NaCl saline (~25-125mOhms at 1KHz). After approximately 14 days of  
260 implantation as shown in Figure 5, the impedances of the electrodes on the epidural surface were

261 higher on average than that of the electrodes on the thinned skull surface. The epidural impedance  
262 interpolation curve shows rise in impedance around one week after implantation and lasting for  
263 approximately 14 days, similar to other microelectrodes implanted in or on cortex in other studies  
264 [36; 38]. This may be attributed to a central nervous system immune response and new tissue  
265 formation and follows previous intracortical and epidural implantation impedance results [9; 36].  
266 Impedances of epidural implants reached a steady state between 2-4 weeks post-implant reflecting  
267 decelerated wound healing. In contrast, the thinned skull impedance interpolation curve remained  
268 relatively stable for approximately 21 days post-surgery, only rising slightly towards the end of the  
269 30-day period. This suggests the chronic electrode/tissue interface is different in composition than the  
270 epidural grids, but also demonstrates that bone regrowth/scarring under the thinned skull electrodes  
271 does not significantly increase the impedance by comparison. Supplementary figure 1 shows line  
272 plots of individually recorded impedance values from each rat over a time period of one month.

273  
274 Decreased impedances during the first few weeks of thinned skull electrode implantation may  
275 suggest edema, and that fluid remained at the electrode/tissue interface without clearing. Extra fluid  
276 could have hypothetically caused shunting of current and increased distance between the electrode  
277 array and the thinned skull. Regardless, we were still able to record spatially and temporally accurate  
278 SSEPs and optogenetically induced field potentials from thinned skull electrodes in rats and mice  
279 with relatively low impedance values (impedance values not acquired post-implantation in acute  
280 mice studies).

### 281 282 **3.3 Comparison of thinned skull vs epidural recordings from optogenetic light stimulation in** 283 **acute terminal mice** 284

285 To further investigate the spatial resolution of information on nearby electrodes given a thinned skull  
286 recording approach, a light stimulus was applied through a clear Parylene C  $\mu$ ECoG array and  
287 thinned skull to optogenetically activate neurons expressing light sensitive proteins. Optogenetically  
288 evoked potentials were recorded in ChR2 mice through a thinned skull (figure 6a) and epidurally  
289 using a smaller 2mm by 2mm clear  $\mu$ ECoG array to generate a consistent focal activation of cortex  
290 for comparison. Evoked responses through the thinned skull showed the highest peak responses near  
291 the foci of optogenetic stimulation after small Laplacian referencing, further demonstrating spatiality  
292 the spatial recording ability of the preparation (Figure 6a). Increasing 473nm laser power also  
293 increased evoked potential peaks amplitudes. A similar response paradigm occurs with epidural  
294 stimulation (figure 6b), however, we obtain a much larger signal possibly due to lack of spatial  
295 filtration of signal through the skull. Figures 6c and 6d use a 2D interpolated heat map to show  
296 differences in peak to peak amplitudes at a stimulation laser power of 545.5mW/mm<sup>2</sup>. Both thinned  
297 skull and epidural heat maps display spatial distinct recordings on nearby electrode sites. Due to the  
298 presumed filtration/attenuation of signal through the skull and other tissues, the thinned skull  
299 recording (Figure 6c) is approximately 10 times less in peak-to-peak amplitude than the epidural  
300 recording (Figure 6d). The thinned skull signal also seems to be slightly more diffuse given  
301 appropriate referencing strategies.

302  
303 One ChR2 mouse underwent an acute procedure where the skull was thinned, and a 465nm LED was  
304 positioned 2 cm away from the thinned skull with the light power and duration values varied to  
305 generate photostimulus strength vs duration curves (Figure 7). The resulting illumination covered  
306 most of the cortical area under the  $\mu$ ECoG array. Stimuli strength and duration were applied  
307 randomly, and peak amplitudes of signals recorded. The thinned skull was then removed exposing  
308 the dural surface and stimulation procedure repeated. Figure 7a depicts a contour plots for signals  
309 recorded from the dura, whereas figure 7b depicts the same plot from the thinned skull.

310

311 The optogenetically evoked  $\mu$ ECoG signal on both the epidural and thinned skull grids demonstrated  
312 spatially distinct information, with waveform reversals often apparent on two adjacent sites. These  
313 reversals, in conjunction with the waveshape of the evoked response, demonstrated that the  
314 electrophysiological recordings were not photoelectric artifacts. Although the magnitude in  $\mu$ Volts  
315 of the evoked signal was approximately 10x less with the thinned skull preparation than with the  
316 epidurally placed grids, the spatial information as assessed by differences in recordings at adjacent  
317 electrode sites was highly similar after post-hoc Small Laplacian referencing.

318

### 319 **3.4 Imaging of immune response in neural tissue to thinned skull and epidural $\mu$ ECoG** 320 **implantations**

321

322 Given the impedance responses over time in all animals, histology was performed on rat M32 to  
323 compare histology to the impedance measurement of approximately 50kOhms at timepoint 32 days  
324 post-implantation. Histologic sectioning and immunochemical staining for glial fibrillary acidic  
325 protein (GFAP) for astrocytes and Iba-1 for microglia and/or infiltrating macrophages was performed  
326 with perfused neural tissue in the single rat with bilateral thinned skull/epidural  $\mu$ ECoG arrays.  
327 (Supplementary figure 2). The cortical region directly beneath the epidural preparation showed  
328 putative increase in GFAP immunoreactivity and projection of astrocytic processes towards the  
329 cortical surface (Supplementary figure 2c). Iba-1 staining did not reveal any obvious increases in  
330 microglial immunoreactivity within the brain tissue on either the epidural or thinned skull  
331 hemispheres (Supplementary figure 2d). However, an apparent thickening of the dura on the epidural  
332 side was observed (Supplementary figure 2f) which contained a higher density of Iba-1 positive cells,  
333 either microglia or infiltrating macrophages, that was not present on the thinned skull side of the  
334 animal (Supplementary figure 2e). Previous studies have also reported thickening of the dura under  
335 the  $\mu$ ECoG array consisting primarily of collagen [22; 39].

336

337 Gross visual inspection of the brain surface post-mortem directly under the thinned skull where a  
338  $\mu$ ECoG array was chronically placed was also directly compared to the surface of the brain directly  
339 under a chronically implanted epidural  $\mu$ ECoG array (see Supplementary Figure 3). Consistent with  
340 data reported by Onal 2003 [21] and Degenhart 2016 [22], the epidurally placed chronic  $\mu$ ECoG  
341 array leaves a visible dent/impression on the surface of the brain upon removal. Similarly, denting is  
342 also visible beneath the two stainless steel mechanical and reference screws placed posterior to the  
343 olfactory bulbs. In contrast, no denting of the brain is evident under the thinned skull where the  
344  $\mu$ ECoG array was chronically placed.

345

346 The main benefit of the thinned skull preparation is that the skull remains partially intact. When the  
347 skull is completely removed many side effects can occur which may impact the interpretation of  
348 behavioral results. Previous studies in the field of *in vivo* imaging have showed increased glial  
349 reaction (microglia and astrocytes) under an open craniotomy window preparation compared to a  
350 thinned skull window preparation in mice [23]. Pneumocephalus can occur after craniotomy in a  
351 clinical setting which involves air being trapped in the cranial cavity [40]. Also, dendritic spine  
352 plasticity has been shown to differ in thinned versus open-skull window preparations, emphasizing  
353 that the neural environment under a craniotomy may be changed by the craniotomy itself [23; 41].  
354 Another benefit the thinned skull recording technique might offer is improved implant mechanical  
355 stability, and the lack of direct contact with the surface of the brain or dura. The latter may reduce  
356 the risk of injury to neural tissue or device failure due to the lack of device movement on the surface  
357 of the brain, although this will need to be investigated in further studies.



## 358 **4.0 Conclusion**

359 In summary, the studies described in this paper for the first time demonstrate that  $\mu$ ECoG grids  
360 placed on a thin skulled can provide stable, spatially distinct electrophysiological information out to  
361 periods in excess of a month. This method may be particularly useful as a complement to other  
362 studies which thin the skull for optical recordings/modulation of neural activity.  $\mu$ ECoG recording  
363 grids may also provide a useful balance between invasiveness, information content, and day to day  
364 stability that may be important for neuroprosthetics applications. In addition, this novel method may  
365 be critically enabling for neuroscience studies in which minimizing the trauma to the underlying  
366 neural or non-neuronal cells of interest is necessary to avoid potential confounds given the  
367 fundamental hypothesis to be tested.

## 368 **5.0 Conflict of Interest**

369 *JW and KL are scientific board members and have stock interests in NeuroOne Medical Inc., a*  
370 *company developing next generation epilepsy monitoring devices. JW also has an equity interest in*  
371 *NeuroNexus technology Inc., a company that supplies electrophysiology equipment and multichannel*  
372 *probes to the neuroscience research community. KL is a co-founder and has an equity interest in*  
373 *Neuronoff, Inc. KL is also paid member of the scientific advisory board of Cala Health, Blackfynn,*  
374 *and Battelle. KL also is a paid consultant for Galvani. Outside of NeuroOne and NeuroNexus where*  
375 *the potential conflict is described in more detail here for transparency, none of these companies at*  
376 *present is developing technology that overlaps with the data discussed in this paper.*

## 377 **6.0 Author Contributions**

378 SB, JN and TR: experimental design, data analysis, and manuscript preparation. AS, KL and JW:  
379 experimental design and manuscript preparation. KC, MH, and JN: data collection and data analysis.  
380 ST for device fabrication, and data collection. LKH contributed to manuscript preparation. All  
381 authors contributed to draft the manuscript and have read and approved the final manuscript.,

## 382 **7.0 Funding**

383 This work was sponsored by the Defense Advanced Research Projects Agency (DARPA) MTO  
384 under the auspices of Dr. Jack Judy and Dr. Doug Weber through the Space and Naval Warfare  
385 Systems Center, Pacific Grant/Contract No. N66001-11-1-4013 and No. N66001 -12-C-4025.

## 386 **8.0 References**

- 387 [1] E.C. Leuthardt, G. Schalk, J.R. Wolpaw, J.G. Ojemann, and D.W. Moran, A brain-computer  
388 interface using electrocorticographic signals in humans. *J Neural Eng* 1 (2004) 63-71.
- 389 [2] E.C. Leuthardt, G. Schalk, D. Moran, and J.G. Ojemann, The emerging world of motor  
390 neuroprosthetics: a neurosurgical perspective. *Neurosurgery* 59 (2006) 1-14; discussion 1-14.
- 391 [3] I. Osorio, M.G. Frei, J. Giftakis, T. Peters, J. Ingram, M. Turnbull, M. Herzog, M.T. Rise, S.  
392 Schaffner, R.A. Wennberg, T.S. Walczak, M.W. Risinger, and C. Ajmone-Marsan,  
393 Performance reassessment of a real-time seizure-detection algorithm on long ECoG series.  
394 *Epilepsia* 43 (2002) 1522-35.
- 395 [4] D.R. Kipke, R.J. Vetter, J.C. Williams, and J.F. Hetke, Silicon-substrate intracortical  
396 microelectrode arrays for long-term recording of neuronal spike activity in cerebral cortex.  
397 *IEEE Trans Neural Syst Rehabil Eng* 11 (2003) 151-5.

- 398 [5] R.A. Normann, and E. Fernandez, Clinical applications of penetrating neural interfaces and Utah  
399 Electrode Array technologies. *J Neural Eng* 13 (2016) 061003.
- 400 [6] A.R. Wyler, G.A. Ojemann, E. Lettich, and A.A. Ward, Jr., Subdural strip electrodes for  
401 localizing epileptogenic foci. *J Neurosurg* 60 (1984) 1195-200.
- 402 [7] D. Khodagholy, J.N. Gelineas, T. Thesen, W. Doyle, O. Devinsky, G.G. Malliaras, and G.  
403 Buzsáki, NeuroGrid: recording action potentials from the surface of the brain. *Nature*  
404 *Neuroscience* 18 (2014) 310.
- 405 [8] C. Henle, M. Raab, J.G. Cordeiro, S. Doostkam, A. Schulze-Bonhage, T. Stieglitz, and J. Rickert,  
406 First long term in vivo study on subdurally implanted micro-ECoG electrodes, manufactured  
407 with a novel laser technology. *Biomed Microdevices* 13 (2011) 59-68.
- 408 [9] D.-W. Park, A.A. Schendel, S. Mikael, S.K. Brodnick, T.J. Richner, J.P. Ness, M.R. Hayat, F.  
409 Atry, S.T. Frye, R. Pashaie, S. Thongpang, Z. Ma, and J.C. Williams, Graphene-based  
410 carbon-layered electrode array technology for neural imaging and optogenetic applications.  
411 *Nature Communications* 5 (2014) 5258.
- 412 [10] S. Thongpang, T.J. Richner, S.K. Brodnick, A. Schendel, J. Kim, J.A. Wilson, J. Hippensteel, L.  
413 Krugner-Higby, D. Moran, A.S. Ahmed, D. Neimann, K. Sillay, and J.C. Williams, A Micro-  
414 Electro-corticography Platform and Deployment Strategies for Chronic BCI Applications. *Clin*  
415 *EEG Neurosci* 42 (2011) 259-65.
- 416 [11] M. Spuler, A. Walter, A. Ramos-Murguialday, G. Naros, N. Birbaumer, A. Gharabaghi, W.  
417 Rosenstiel, and M. Bogdan, Decoding of motor intentions from epidural ECoG recordings in  
418 severely paralyzed chronic stroke patients. *J Neural Eng* 11 (2014) 066008.
- 419 [12] A. Myrden, and T. Chau, Effects of user mental state on EEG-BCI performance. *Front Hum*  
420 *Neurosci* 9 (2015).
- 421 [13] E. Fernández, M.H.U.o.E. Bioengineering Institute, Elche, Spain, Z. CIBER-BBN, Spain,  
422 e.fernandez@umh.es, B. Greger, A.S.U. School of Biological and Health Systems  
423 Engineering, Tempe, AZ, USA, P.A. House, U.o.U. Department of Neurosurgery, Salt Lake  
424 City, UT, USA, I. Aranda, H.G.U. Department of Pathology, Alicante, Spain, C. Botella,  
425 H.L.F. Department of Neurosurgery, Valencia, Spain, J. Albisua, F.J.D.a.H.R.J.C.  
426 Department of Neurosurgery, Madrid, Spain, C. Soto-Sánchez, M.H.U.o.E. Bioengineering  
427 Institute, Elche, Spain, Z. CIBER-BBN, Spain, A. Alfaro, M.H.U.o.E. Bioengineering  
428 Institute, Elche, Spain, Z. CIBER-BBN, Spain, R.A. Normann, and U.o.U. Department of  
429 Bioengineering, Salt Lake City, UT, USA, Acute human brain responses to intracortical  
430 microelectrode arrays: challenges and future prospects. *Frontiers in Neuroengineering* 7  
431 (2014).
- 432 [14] J.A. Uriguen, and B. Garcia-Zapirain, EEG artifact removal-state-of-the-art and guidelines. *J*  
433 *Neural Eng* 12 (2015) 031001.
- 434 [15] W.M. Grill, S.E. Norman, and R.V. Bellamkonda, Implanted neural interfaces: biochallenges  
435 and engineered solutions. *Annu Rev Biomed Eng* 11 (2009) 1-24.
- 436 [16] M. Goss-Varley, K.R. Dona, J.A. McMahan, A.J. Shoffstall, E.S. Erefej, S.C. Lindner, and J.R.  
437 Capadona, Microelectrode implantation in motor cortex causes fine motor deficit:  
438 Implications on potential considerations to Brain Computer Interfacing and Human  
439 Augmentation. *Scientific Reports* 7 (2017) 15254.

- 440 [17] J.D. Falcone, S.L. Carroll, T. Saxena, D. Mandavia, A. Clark, V. Yarabarla, and R.V.  
441 Bellamkonda, Correlation of mRNA Expression and Signal Variability in Chronic  
442 Intracortical Electrodes. *Front Bioeng Biotechnol* 6 (2018).
- 443 [18] C. Marin, I.o.B. University Miguel Hernandez, Elche, Spain, cmarin@umh.es, E. Fernandez,  
444 B.a.N. Center for Biomedical Research Network in Bioengineering, Elache, Spain, I.o.B.  
445 University Miguel Hernandez, Elche, Spain, and e.fernandez@umh.es, Biocompatibility of  
446 intracortical microelectrodes: current status and future prospects. *Frontiers in*  
447 *Neuroengineering* 3 (2010).
- 448 [19] J.W. Salatino, K.A. Ludwig, T.D.Y. Kozai, and E.K. Purcell, Glial responses to implanted  
449 electrodes in the brain. *Nature Biomedical Engineering* 1 (2017) 862.
- 450 [20] A.J. Shoffstall, J.E. Paiz, D.M. Miller, G.M. Rial, M.T. Willis, D.M. Menendez, S.R. Hostler,  
451 and J.R. Capadona, Potential for thermal damage to the blood-brain barrier during  
452 craniotomy: implications for intracortical recording microelectrodes. *J Neural Eng* 15 (2018)  
453 034001.
- 454 [21] C. Onal, H. Otsubo, T. Araki, S. Chitoku, A. Ochi, S. Weiss, I. Elliott, O.C. Snead, 3rd, J.T.  
455 Rutka, and W. Logan, Complications of invasive subdural grid monitoring in children with  
456 epilepsy. *J Neurosurg* 98 (2003) 1017-26.
- 457 [22] A.D. Degenhart, J. Eles, R. Dum, J.L. Mischel, I. Smalianchuk, B. Endler, R.C. Ashmore, E.C.  
458 Tyler-Kabara, N.G. Hatsopoulos, W. Wang, A.P. Batista, and X.T. Cui, Histological  
459 Evaluation of a Chronically-implanted Electrographic Electrode Grid in a Non-human  
460 Primate. *J Neural Eng* 13 (2016) 046019.
- 461 [23] G. Yang, F. Pan, C.N. Parkhurst, J. Grutzendler, and W.B. Gan, Thinned-skull cranial window  
462 technique for long-term imaging of the cortex in live mice. *Nat Protoc* 5 (2010) 201-8.
- 463 [24] A.Y. Shih, C. Mateo, P.J. Drew, P.S. Tsai, and D. Kleinfeld, A Polished and Reinforced  
464 Thinned-skull Window for Long-term Imaging of the Mouse Brain, *J Vis Exp*, 2012.
- 465 [25] D.E. Bonder, and K.D. McCarthy, Astrocytic Gq-PCR-Linked IP3R-Dependent Ca<sup>2+</sup>  
466 Signaling Does Not Mediate Neurovascular Coupling in Mouse Visual Cortex In Vivo, *J*  
467 *Neurosci*, 2014, pp. 13139-50.
- 468 [26] G. Yang, F. Pan, C.N. Parkhurst, J. Grutzendler, and W.-B. Gan, Thinned-skull cranial window  
469 technique for long-term imaging of the cortex in live mice. *Nature Protocols* 5 (2010) 201.
- 470 [27] M. Akhtari, H.C. Bryant, A.N. Mamelak, E.R. Flynn, L. Heller, J.J. Shih, M. Mandelkern, A.  
471 Matlachov, D.M. Ranken, E.D. Best, M.A. DiMauro, R.R. Lee, and W.W. Sutherling,  
472 Conductivities of three-layer live human skull. *Brain Topogr* 14 (2002) 151-67.
- 473 [28] P.J. Drew, A.Y. Shih, J.D. Driscoll, P.M. Knutsen, P. Blinder, D. Davalos, K. Akassoglou, P.S.  
474 Tsai, and D. Kleinfeld, Chronic optical access through a polished and reinforced thinned  
475 skull. *Nature Methods* 7 (2010) 981.
- 476 [29] A.A. Schendel, S. Thongpang, S.K. Brodnick, T.J. Richner, B.D. Lindevig, L. Krugner-Higby,  
477 and J.C. Williams, A cranial window imaging method for monitoring vascular growth around  
478 chronically implanted micro-ECOG devices. *J Neurosci Methods* 218 (2013).
- 479 [30] D.-W. Park, S.K. Brodnick, J.P. Ness, F. Atry, L. Krugner-Higby, A. Sandberg, S. Mikael, T.J.  
480 Richner, J. Novello, H. Kim, D.-H. Baek, J. Bong, S.T. Frye, S. Thongpang, K.I. Swanson,  
481 W. Lake, R. Pashaie, J.C. Williams, and Z. Ma, Fabrication and utility of a transparent  
482 graphene neural electrode array for electrophysiology,. *Nature Protocols* 11 (2016) 2201.

- 483 [31] T.J. Richner, S. Thongpang, S.K. Brodnick, A.A. Schendel, R.W. Falk, L.A. Krugner-Higby, R.  
484 Pashaie, and J.C. Williams, Optogenetic micro-electrocorticography for modulating and  
485 localizing cerebral cortex activity. *J Neural Eng* 11 (2014) 016010.
- 486 [32] D.J. McFarland, L.M. McCane, S.V. David, and J.R. Wolpaw, Spatial filter selection for EEG-  
487 based communication. *Electroencephalogr Clin Neurophysiol* 103 (1997) 386-94.
- 488 [33] K.A. Ludwig, R.M. Miriani, N.B. Langhals, M.D. Joseph, D.J. Anderson, and D.R. Kipke,  
489 Using a Common Average Reference to Improve Cortical Neuron Recordings From  
490 Microelectrode Arrays, *J Neurophysiol*, 2009, pp. 1679-89.
- 491 [34] F.A. Bazley, C. Hu, A. Maybhate, A. Pourmorteza, N. Pashai, N.V. Thakor, C.L. Kerr, and A.H.  
492 All, Electrophysiological evaluation of sensory and motor pathways after incomplete  
493 unilateral spinal cord contusion. *J Neurosurg Spine* 16 (2012) 414-23.
- 494 [35] K. Sakatani, H. Iizuka, and W. Young, Somatosensory evoked potentials in rat cerebral cortex  
495 before and after middle cerebral artery occlusion. *Stroke* 21 (1990) 124-32.
- 496 [36] J.C. Williams, J.A. Hippensteel, J. Dilgen, W. Shain, and D.R. Kipke, Complex impedance  
497 spectroscopy for monitoring tissue responses to inserted neural implants. *J Neural Eng* 4  
498 (2007) 410-23.
- 499 [37] W. Wang, C.K. Kim, and A.Y. Ting, Molecular tools for imaging and recording neuronal  
500 activity. *Nature Chemical Biology* 15 (2019) 101.
- 501 [38] K.A. Ludwig, J.D. Uram, J. Yang, D.C. Martin, and D.R. Kipke, Chronic neural recordings  
502 using silicon microelectrode arrays electrochemically deposited with a poly(3,4-  
503 ethylenedioxythiophene) (PEDOT) film. *J Neural Eng* 3 (2006) 59-70.
- 504 [39] A.A. Schendel, M.W. Nonte, C. Vokoun, T.J. Richner, S.K. Brodnick, F. Atry, S. Frye, P.  
505 Bostrom, R. Pashaie, S. Thongpang, K.W. Eliceiri, and J.C. Williams, The effect of micro-  
506 ECoG substrate footprint on the meningeal tissue response. *J Neural Eng* 11 (2014) 046011.
- 507 [40] D.K. Reasoner, M.M. Todd, F.L. Scamman, and D.S. Warner, The incidence of  
508 pneumocephalus after supratentorial craniotomy. Observations on the disappearance of  
509 intracranial air. *Anesthesiology* 80 (1994) 1008-12.
- 510 [41] H.T. Xu, F. Pan, G. Yang, and W.B. Gan, Choice of cranial window type for in vivo imaging  
511 affects dendritic spine turnover in the cortex. *Nat Neurosci* 10 (2007) 549-51.

## 512 9.0 Figure Legends

513 **Figure 1:** (a) Diagram illustrating chronic placement of 16-channel bilateral  $\mu$ ECoG array, and ZIF  
514 connector on thinned skull surface over sensorimotor cortex in a rat. (b) Polyimide based platinum  
515  $\mu$ ECoG array with 16 channels (750  $\mu$ m spacing, 250  $\mu$ m site diameter). (c) Surgical photograph of  
516 bilateral Parylene C based platinum  $\mu$ ECoG array being placed over a thinned skull (top of  
517 photograph) and on the dural surface (bottom of photograph).

518  
519 **Figure 2:** (a) Illustration of  $\mu$ ECoG electrode array placement over a thinned skull in a mouse with  
520 optical fiber positioning. (b) Optogenetic stimulation of cortex with optical fiber placed on a  $\mu$ ECoG  
521 array over either thinned skull. (c) Parylene C based platinum  $\mu$ ECoG array with 16 channels (500  
522  $\mu$ m spacing, 150  $\mu$ m site diameter) and ZIF connector.

523  
524 **Figure 3:** Somatosensory evoked potentials (SSEPs) recorded on day 20 post-implantation from a rat  
525 implanted with a 16-channel  $\mu$ ECoG array placed over thinned skull left sensorimotor cortex.



526 Biphasic current pulses (1 ms, varied amplitude) were used to stimulate the right hindlimb with  
527 surface electrodes over the sciatic nerve. (a) Stainless-steel bone screw, (b) Common Average and  
528 (c) small Laplacian referencing strategies are shown to increase the signal-to-noise ratio, and to  
529 reveal spatial signaling from the predicted hindlimb anatomical region.  
530

531 **Figure 4:** Somatosensory evoked potentials (SSEPs) on day 38 post-implantation with small  
532 Laplacian referencing from forelimb and hindlimb electrical surface stimulation using a 16-channel  
533  $\mu$ ECoG array placed over a thinned skull portion of rat sensorimotor cortex. Plots represent spatial  
534 recordings from the same electrode array, demonstrating LFPs from (a) biphasic forelimb stimulation  
535 and (b) monophasic hindlimb stimulation. Stimuli were applied for 1ms at 1.25mA. Activity is  
536 represented by 2D interpolated heat maps. The portions closer to the red spectrum show evoked  
537 activity higher than baseline when averaged over at least 25 trials, and closer to blue shows negative  
538 activity. The x scale bar, 20 ms; y scale bar, 20  $\mu$ V.  
539

540 **Figure 5:** (a) Chronic impedance spectral data at 1kHz from thinned skull (blue) and epidurally (red)  
541 implanted  $\mu$ ECoG electrodes in rats. Each interpolation curve represents three animals per group,  
542 and 32 electrode sites per animal. Individual data points represent individual electrode site  
543 impedance spectra measurements. Epidural impedances increase until approximately two weeks and  
544 plateau, while thinned skull impedances remain lower and more stable.  
545

546 **Figure 6:** Optically evoked local field potentials from thinned skull (a) and epidurally (b) implanted  
547  $\mu$ ECoG arrays in an acute, terminal Thy1-ChR2 mouse. Amplitude heat maps show the 545.5  
548 mW/mm<sup>2</sup> optically evoked potentials using small Laplacian referencing from both the (c) thin skull  
549 and (d) epidural preparations. Each can be processed to illustrate the spatial resolution of the  
550 recordings, although the difference in scale is smaller in the thinned skull preparation by  
551 approximately a magnitude of 10.  
552

553 **Figure 7:** Photostimulus duration versus amplitude peak potential 2D interpolated contour plot.  
554 Stimulus strength is plotted against stimulus duration. Interpolated curves denoting the peak  
555 depolarization amplitudes (in  $\mu$ V) for the stimulus strength/duration are shown for (a) epidural and  
556 (b) thinned skull  $\mu$ ECoG recordings in an acute terminal Thy1-ChR2 mouse. Longer stimulus  
557 durations and stimulus strength (power) are needed to evoke similar sized neural signal amplitudes in  
558 the thinned skull versus epidural preparations.  
559

560

561

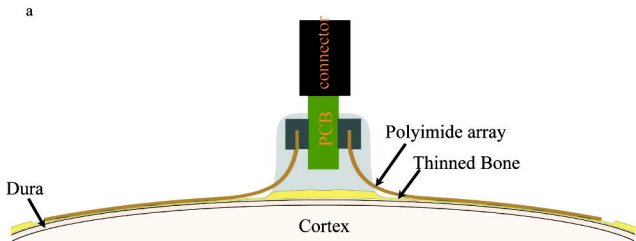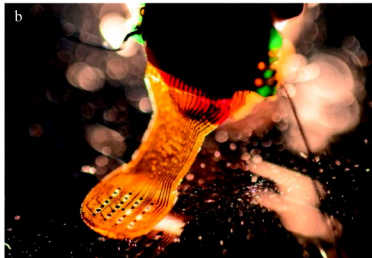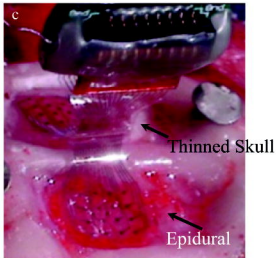

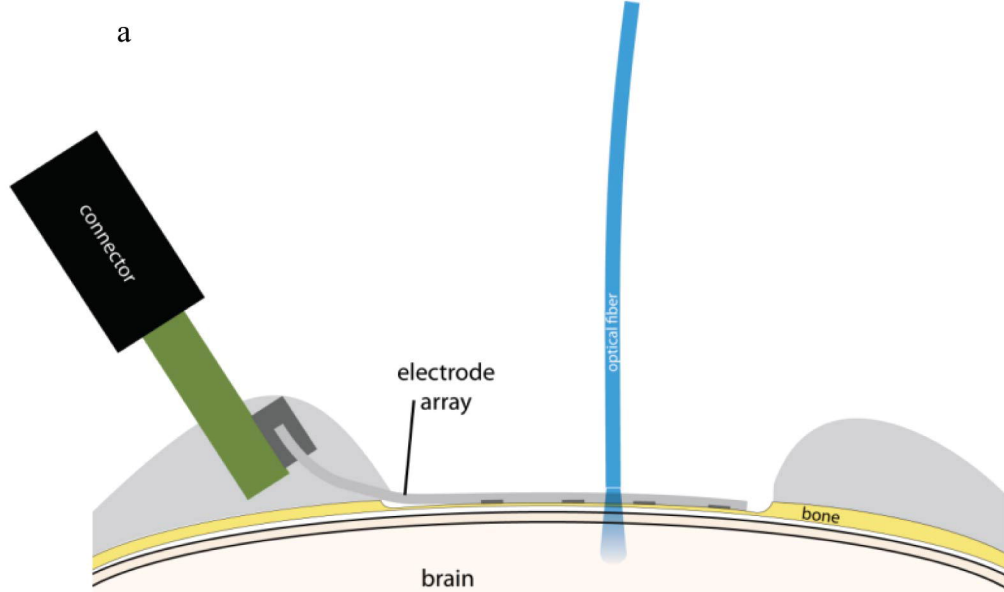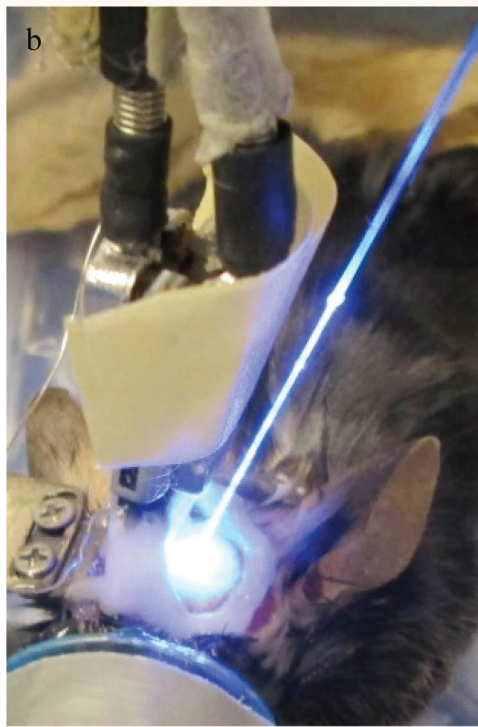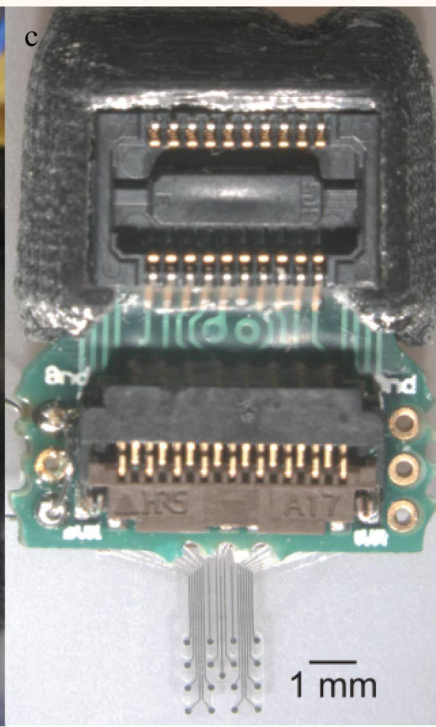

**a**

Normal

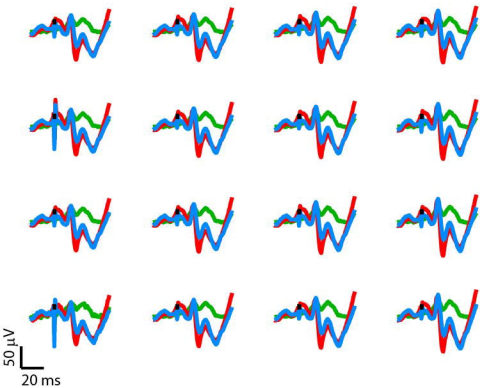**b**

Common Average

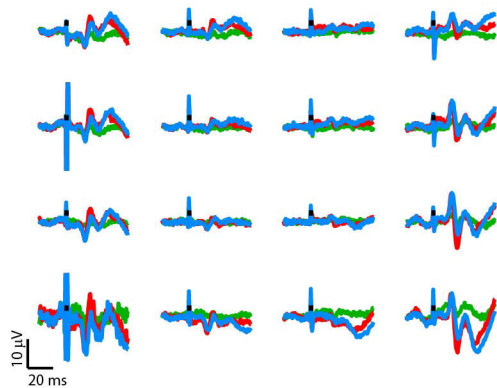**c**

Small Laplacian

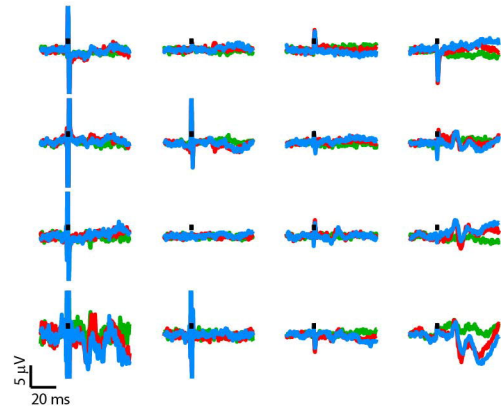

— 2.5mA

— 2.0mA

— 1.5mA

— Stimulus



a

## Left Forelimb

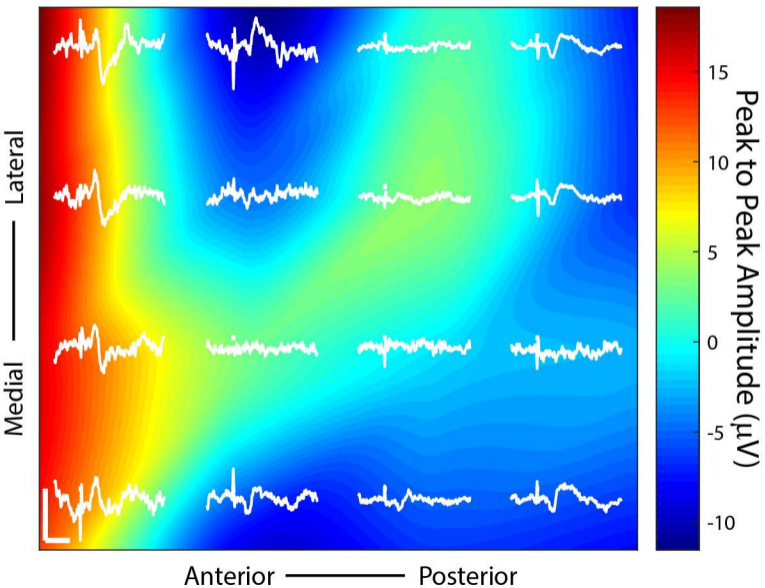

b

## Left Hindlimb

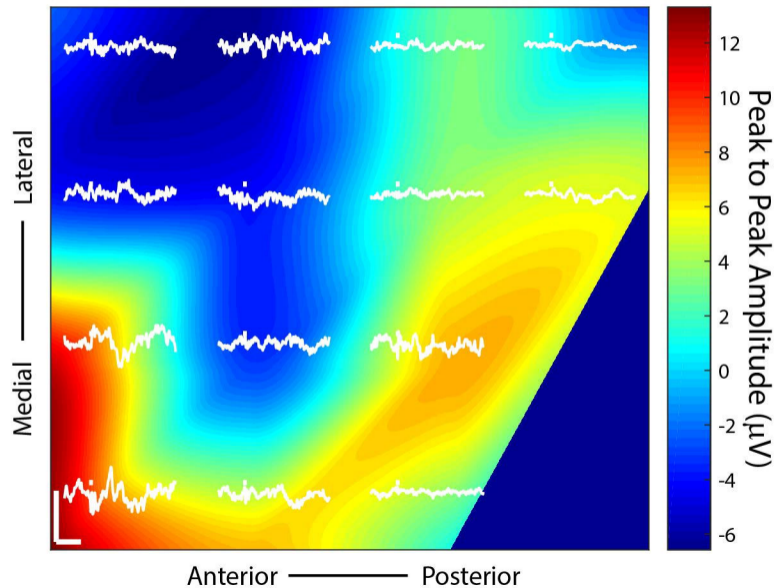

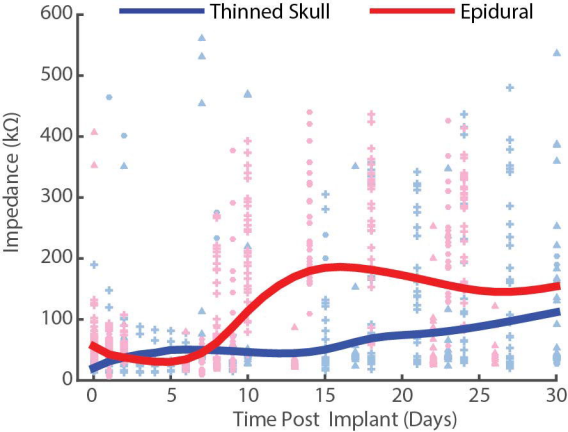

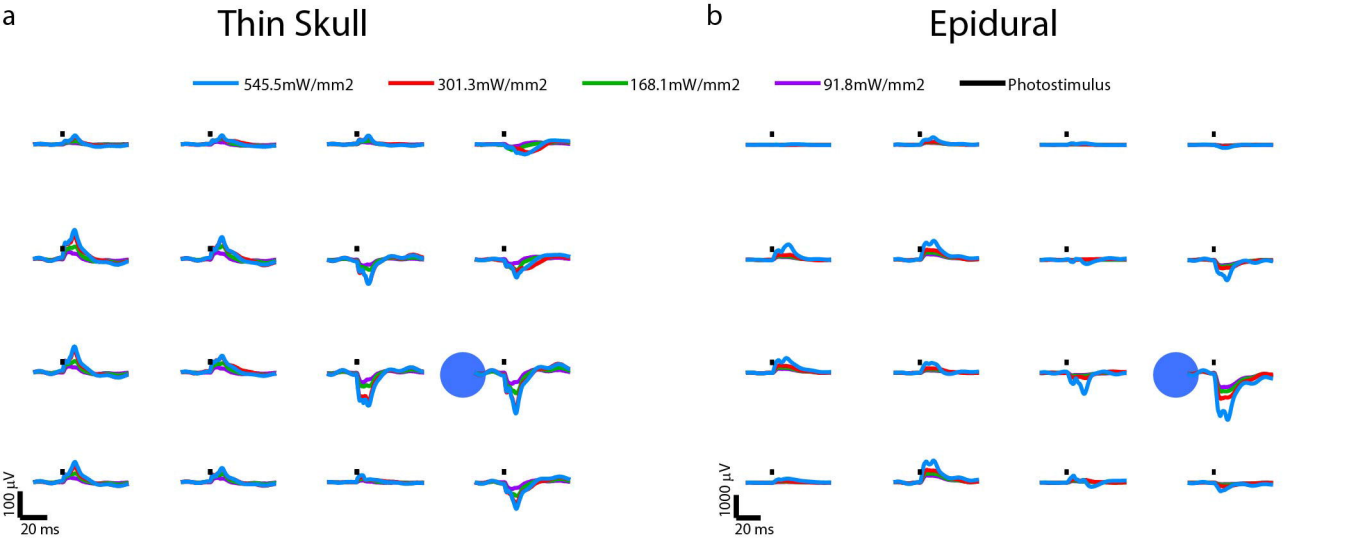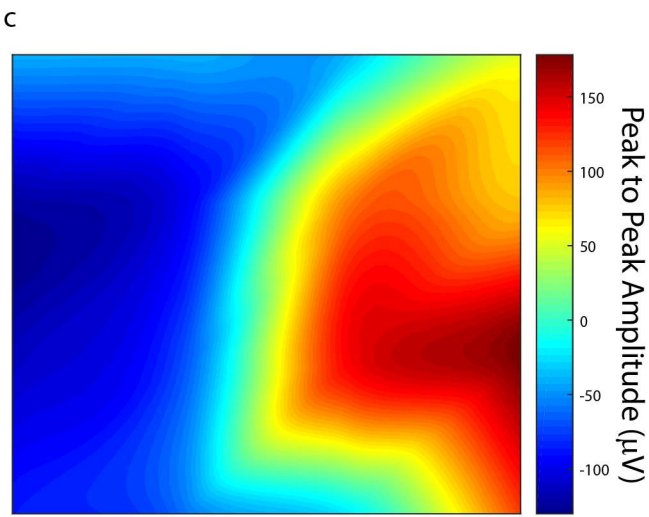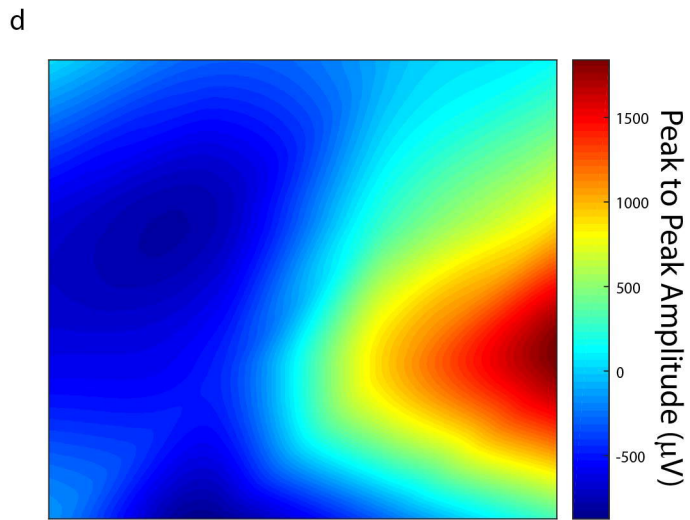

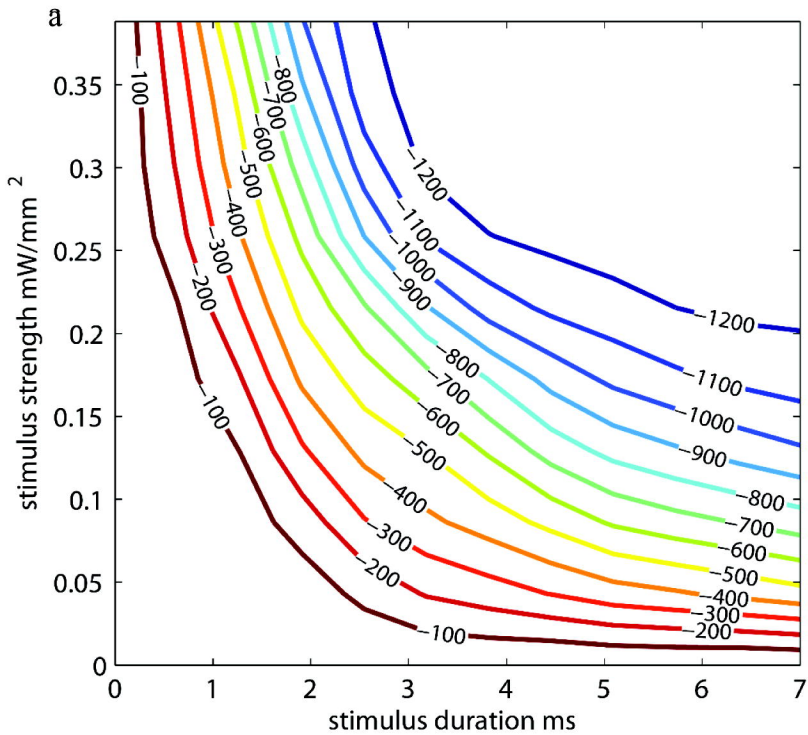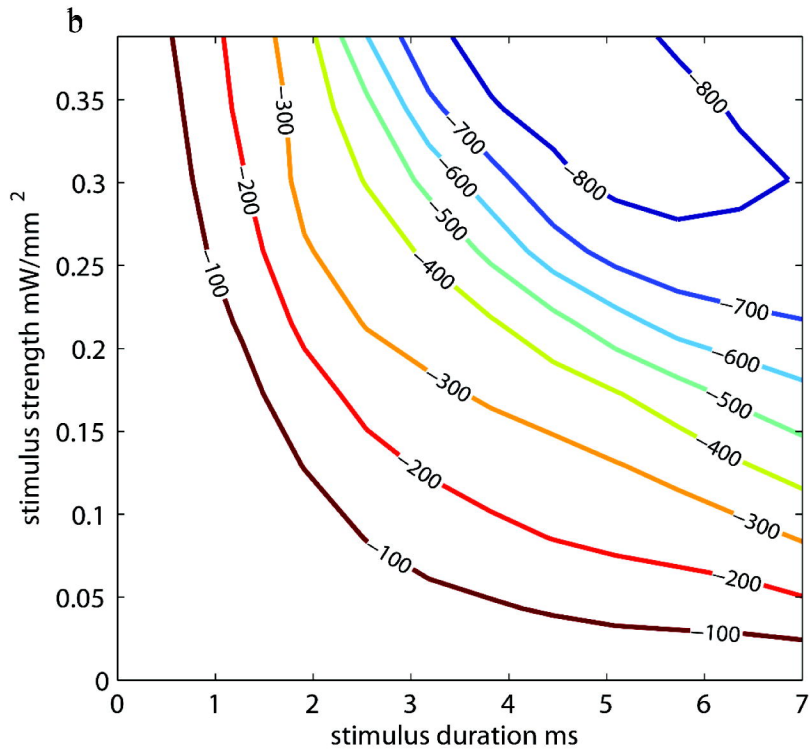

Source: https://www.biorxiv.org/content/10.1101/564146v2.full.pdf
